# Supplementary material for: Development of polyethyleneimine cross-linked fucoidan nanoparticles as delivery systems for improved anticancer efficiency of cytarabine in breast adenocarcinoma cell lines
Source: Royal Society of Chemistry journal article supplement (doi:10.1039/d3pm00078h), 2024-01-01
Supplement: d3pm00078h1.pdf [file d3pm00078h1.pdf]

## Supporting Information

### **Development of polyethyleneimine cross-linked fucoidan nanoparticles as delivery systems for improved anticancer efficiency of cytarabine in breast adenocarcinoma cell lines.**

Deepa Geethakumari <sup>a</sup>, Santhini Pulikkal Veettil <sup>a,d</sup>, Sivakumar Krishnankutty Nair Chandrika<sup>a,b</sup>, Anoop Bhaskaran Sathyabhama <sup>a</sup>, Rojin Joseph <sup>a</sup>, Shibin Sobhanam Padmini<sup>a</sup>, Jisha V Somasekharan <sup>c</sup> and Sajeevan Thavarool Puthiyedathu <sup>e\*</sup>

- a. National Centre for Aquatic Animal Health, Cochin University of Science and Technology, Cochin, Kerala – 16
- b. Rajiv Gandhi Centre for Biotechnology, Poojappura, Thiruvananthapuram, Kerala - 695014
- c. Research and Post Graduate Department of Chemistry, MES Keveeyam College, Valanchery-676552, Kerala, India
- d. Department of Applied Chemistry, Cochin University of Science and Technology, Cochin, Kerala –682022, India
- e. Department of Marine Biology, Microbiology and Biochemistry, Cochin University of Science and Technology, Cochin, Kerala – 16

\*Corresponding author: Sajeevan Thavarool Puthiyedathu, Tel: +91-9946099408, Fax: +91484 2381120, E-mail: [sajeev@cusat.ac.in](mailto:sajeev@cusat.ac.in)

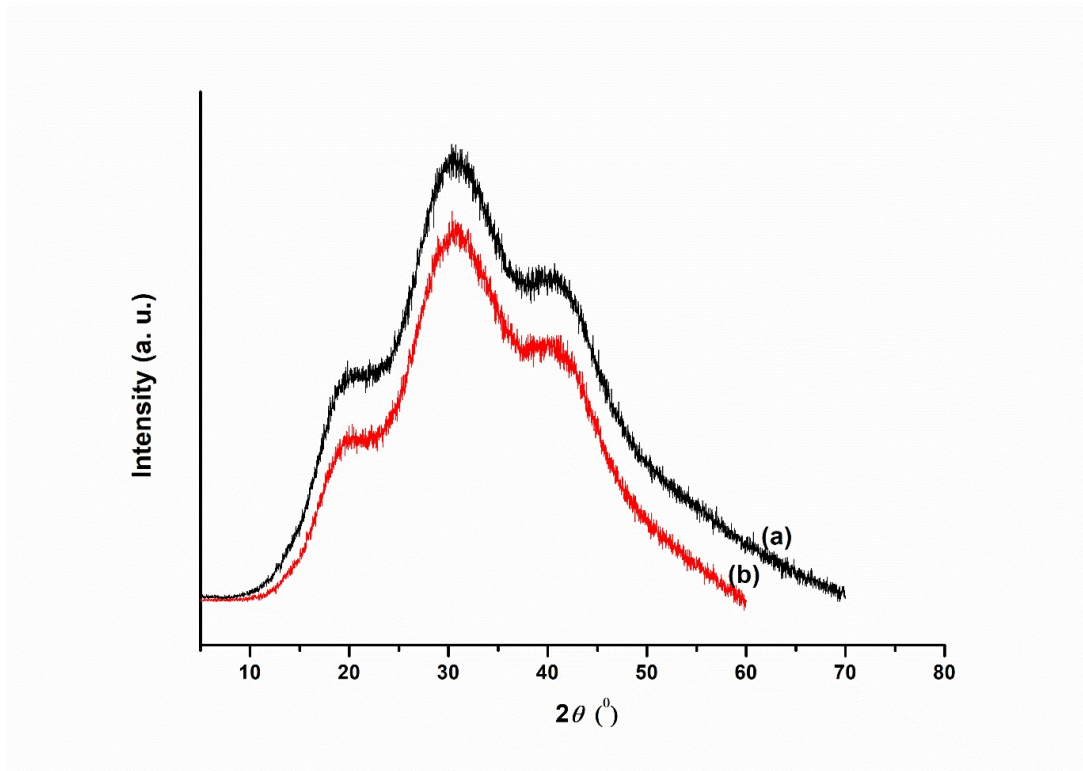

Supplementary Fig 1. X-ray diffractograms of fucoidan (a) and fucoidan-PEI complex (b)

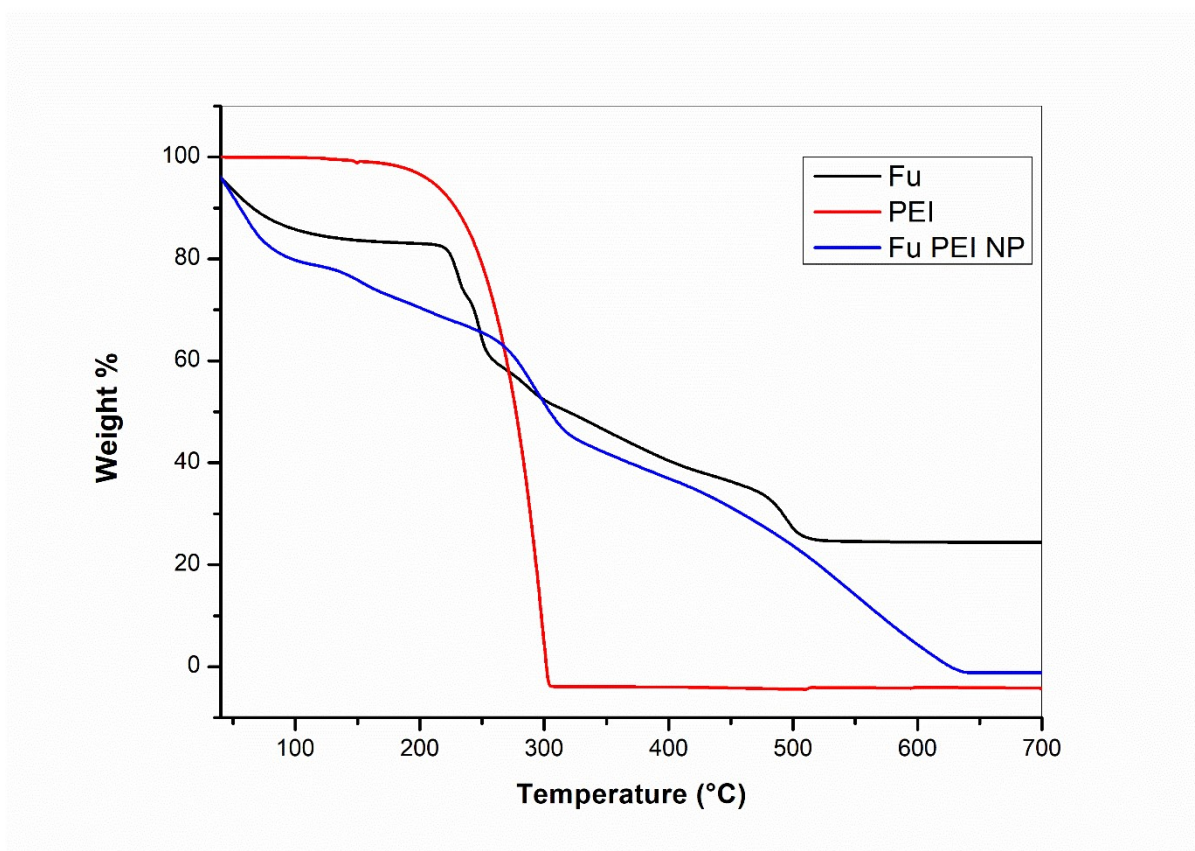

Supplementary Fig 2. TGA curves of fucoidan, PEI and FuNPs

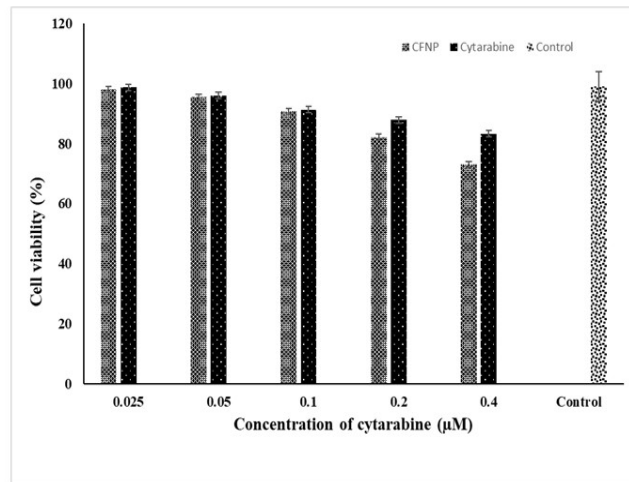

Supplementary Fig 3 Cell viability studies of cytarabine and CFNP in MCF-7 cell lines by MTT assay; Results expressed as mean  $\pm$  SD ( $p$  value  $\leq 0.05$ )
